# Supplementary material
Source: PubMed Central journal article supplement (PMC14714)
Supplement: pnas_98_3_1095__1.pdf [file pnas_98_3_1095__1.pdf]

Supplementary material for Suarez *et al.* (2001) *Proc. Natl. Acad. Sci. USA* **98** (3), 1095–1100. (10.1073/pnas.031573098)

**Table 3.** Publications used in reconstructing the spread of Argentine ants in the United States

- 
- Albrecht, M. (1995) *Proc. Oklahoma Acad. Sci.* **75**, 21-24.\*
- Barber, T. C. (1916) *U.S. Dep. Agric. Bur. Entomol. Bull.* **377**, 1-23.\*
- Buren, W. F. (1944) *Iowa State Coll. J. Sci.* **18**, 277-312.
- Carter, W. G. (1962) *J. Mitchell Soc.* **November**, 150-203.
- Dearborn, R., Bradbury, R. & Russell, G. (1983) Maine Forest Service, Entomol. Div., Tech. Report No. 20.
- Deyrup, M., Johnson, C., Wheeler, G. C. & Wheeler, J. (1989) *Florida Entomol.* **72**, 91-101.\*
- Dietz, H. F. (1921) *J. Econ. Entomol.* **14**, 188-194.
- DuBois, M. B. & Danoff-Burg, J. (1994) *Sociobiology* **24**, 147-178.
- DuBois, M. B. & LeBerge, W. E. (1989) in *Advances in Myrmecology*, ed. Trager J. C. (E. J. Brill, New York), pp. 133-156.
- Gregg, R. E. (1944) *Ann. Entomol. Soc. Am.* **37**, 447-480.
- Harned, R.W. & Smith, M. R. (1922) *J. Econ. Entomol.* **15**, 261-264.\*
- Klotz, J. H., Mangold, J. R., Vail, K. M., Davis, L. R. & Patterson, R. S. (1995) *Florida Entomol.* **78**, 109-118.\*
- Knight, R. L. & Rust, M. K. (1990) *Southwestern Entomol.* **15**, 167-178.\*
- Newell, W. (1914) *J. Econ. Entomol.* **7**, 153.\*
- Newell, W. & Barber, T. C. (1913) *U.S. Dep. Agric. Bur. Entomol. Bull.* **122**, 1-98.\*
- Smith, M. R. (1930) *Florida Entomol.* **14**, 1-6.
- Smith, M. R. (1933) *Florida Entomol.* **17**, 21-26.\*
- Smith, M. R. (1934) *J. N.Y. Entomol. Soc.* **42**, 353-361.\*
- Smith, M. R. (1936) *U.S. Dep. Agric. Circ.* **387**, 1-39.\*
- Warren, L. O. & Rouse, E. P. (1969) *Univ. Arkansas, Agric. Exp. Stn. Bull.* **742**, 1-46.\*
- Wheeler, W. M (1932) *J. N.Y. Entomol. Soc.* **45**, 1-17.\*

- Wheeler, G. C. & Wheeler, J. (1963) *The Ants of North Dakota* (Univ. of North Dakota Press, Grand Rapids, ND).
- Wheeler, G. C. & Wheeler, J. (1985) *Prairie Nat.* **17**, 49-64.\*
- Wheeler, G. C. & Wheeler, J. (1986) *The Ants of Nevada* (Natural History Museum of Los Angeles, Los Angeles).\*
- Wheeler, G. C. & Wheeler, J. (1987) *Prairie Nat.* **19**, 199-208.
- Wheeler, G. C. & Wheeler, J. (1988) *Psyche* **95**, 101-114.
- Wheeler, G. C. & Wheeler, J. (1989) *Prairie Nat.* **21**, 203-210.
- Wheeler, G. C., Wheeler, J. & Kannowski, P. B. (1994) *Great Lakes Entomol.* **26**, 297-310.
- Wing, M. W. (1939) *Entomol. News* **June**, 161-165.
- Woodworth, C. W. (1908) *Univ. Calif. Agric. Exp. Stn. Circ.* **38**, 1-11.\*
- Woodworth, C. W. (1910) *Univ. Calif. Agric. Exp. Stn. Bull.* **207**, 51-82.\*
- Young, J. & Howell, D. (1964) *Oklahoma State Univ. Exp. Stn. Misc. Pub.* **MP-71**, 1-42.

---

\*Publication provided information regarding the first recorded date of *Linepithema humile* in a particular county.
