# Supplementary material
Source: PubMed Central journal article supplement (PMC14714)
Supplement: pnas_98_3_1095__2.pdf [file pnas_98_3_1095__2.pdf]

Supplementary material for Suarez *et al.* (2001) *Proc. Natl. Acad. Sci. USA* **98** (3), 1095–1100. (10.1073/pnas.031573098)

**Table 4.** Collections (and contact person) used in determining the worldwide distribution of Argentine ants and reconstructing their spread in the United States

---

American Entomological Institute (David Wahl)  
American Museum of Natural History, Smithsonian\* (Ted Schultz)  
Archibold Biological Station\* (Mark Dyrup)  
Arizona State University (Michael Douglas)  
Bohart Museum of Entomology, University of California, Davis\* (Phil Ward)  
Boise State University, ID (C. Baker)  
Buffalo Museum of Science, NY (Wayne Gall)  
California Academy of Sciences, Oakland\* (Bob Zuparko)  
California State University, North Ridge\* (James Hogue)  
Cincinnati Museum Center (Gene Kritsky)  
Clemson University, Arthropod Collection\* (Brad Robinson)  
Cleveland Museum Natural History, OH (S. Teraguchi)  
Cranbrook Institute of Science, MI (Mark Uhen)  
Dayton Museum of Natural History (Brian Rayburn and Gary Coovert)  
Dixie College (Andrew Barnum)  
Essig Museum of Entomology, Berkeley\* (Cheryl Barr)  
Field Museum Natural History, Chicago\* (Dan Summers)  
Florida Department of Agriculture, Division of Plant Industry\* (Lionel Strange)  
Frost Entomological Museum, Pennsylvania State University\* (J. Grehan)  
Great Smokey Mountains National Park (Don DeFoe)  
Hawaii Department of Agriculture, Plant Quarentine Branch\* (Neil Reimer)  
Hawaii Department of Agriculture, Division of Plant Industry\* (Bernarr Kumashiro)  
Houston Museum of Natural Science (John Watts)  
Los Angeles County Museum, Los Angeles\* (Roy Snelling)  
Idaho Museum of Natural History (Stephan Sommer)

Illinois Natural History Survey (W. LaBerge)  
Insect and Disease Laboratory, Augusta, ME (Richard Dearborn)  
Michigan State University\* (Fred Stehr)  
Milwaukee Public Museum, WI (Gary Noonan)  
Mississippi Entomological Museum, Mississippi State University\* (Terry Schiefer)  
Museo de Ciencias Naturales, Buenos Aires\* (Axel Bachman)  
Museum of Comparative Zoology, Harvard\* (Stefan Cover)  
New York State Museum (Tim McCabe)  
North Carolina Department of Agriculture, Plant Industry Division\* (Kenneth Ahlstrom)  
North Carolina State University, Department of Entomology (Bob Blinn)  
Ohio State University\* (Andrey Sharkov)  
Oklahoma Museum Natural History (Victoria Byre)  
Oklahoma State University\* (Don Arnold)  
Oregon Department of Agriculture, Entomology Museum\* (Richard Wescott)  
Pennsylvania Department of Agriculture, Bureau of Plant Industry (Karl Valley)  
Purdue University, West Lafayette, IN (Daniel Suiter)  
St. Cloud State University, MN (Ralph Gundersen)  
Science Museum of Minnesota (Lori Benson)  
South Dakota State University\* (Paul Johnson)  
Southern Illinois University, Department of Zoology (J. E. McPherson)  
Texas A&M University, Department of Entomology\* (Ed Riley)  
University of Arizona\* (Carl Olson)  
University of Arkansas Arthropod Museum\*  
University of California at Riverside, Entomology Research Museum\* (Saul Frommer)  
University of Colorado Museum, Boulder\* (Virginia Scott)  
University of Connecticut (Jane O'Donnell)  
University of Delaware\* (Charles Bartlett)  
University of Kansas, Natural History Museum\* (Robert Brooks)  
University of Louisville, KY (Charles Covell)  
University of Maine (Stephan Woods)  
University of Massachusetts, Amherst (T. M. Peters)

University of Michigan, Museum of Zoology\* (Mark O'Brien)  
University of Minnesota, Department of Entomology\* (Philip Clansen)  
University of Mississippi (Paul Lago)  
University of Missouri, Department of Entomology (Bob Sites)  
University of Nebraska, Systematics Research Collections (Brett Ratcliffe)  
University of New Hampshire\* (Don Chandler)  
University of New Mexico (Sandra Brantley)  
University of Tennessee, Entomology Collection (M. Pan)  
University of Wisconsin, Insect Research Collection (Steven Krauth)  
University of Wyoming (Scott Shaw)  
Virginia Museum Natural History at Virginia Polytechnic Institute and State  
University (Michael Kostanab)

---

Because some records for Central and South America (where other native *Linepithema* occur) may pertain to species other than *L. humile*, the first author (A.V.S.) examined material at the Museo de Ciencias Naturales in Buenos Aires, Argentina, and the following museums in the United States: United States National Museum (Smithsonian), Los Angeles County Museum, Bohart Museum (University of California, Davis), and the Chicago Field Museum of Natural History.

\*Presence of *Linepithema humile* in the collection.
